# Supplementary material
Source: publisher site journal article supplement (https://www.dovepress.com/article/586896)
Supplement: Supplementary file 1 [file 586896%20Supplementary%20Material.docx]

**Supplementary information**

**Supplement Material 1**

Literature search

A literature search was conducted in PubMed using a combination of MeSH terms, including “PCI", "prediction model", and "Target Lesion Revascularization (TLR)." All relevant articles published between 2020 and 2025 were screened and analyzed by two different reviewers. Each study was evaluated for study population, outcome, variables, sample size, outcome incidence, included years, limitations, and remarks. Studies were included if they investigated prediction models for TLR, were published in English and reported original clinical data. Studies were excluded if they investigated outcomes unrelated to TLR, lacked detail about predictors or study population. All variables found relevant within the studies were matched with relevant predictors available within the Netherlands Heart Registration (NHR) database and discussed with clinicians.

**Table S1:** Identification and availability of potential predictors for Target Lesion Revascularization (TLR).

| Type predictor | Predictor | Numbers of studies reporting | Available in NHR study cohort | Available in NHR sub-cohort |
| --- | --- | --- | --- | --- |
| Patient characteristics | Age | 8 | YES | YES |
| Diabetes mellitus | 8 | YES | YES |
| CKD / Renal dysfunction / Dialysis | 3 | YES | YES |
| ACS / STEMI at admission | 2 | YES | YES |
| Gender | 2 | YES | YES |
| Hypertension | 2 |  |  |
| LVEF | 2 | YES | YES |
| Previous PCI | 2 | YES | YES |
| Absence of clopidogrel | 1 |  |  |
| BMI | 1 | YES | YES |
| Cardiogenic shock | 1 | YES | YES |
| COPD | 1 | YES | YES |
| Multivessel / LM disease | 1 | YES | YES |
| Previous MI | 1 | YES | YES |
| Prior bypass surgery | 1 | YES | YES |
| Smoking | 1 |  |  |
| Procedural | Stent diameter | 4 |  | YES |
| ≥2 vessel disease / number diseased vessels | 3 | YES | YES |
| Stent length (total) | 3 |  | YES |
| Bifurcation / diffuse stenosis / non-focal ISR | 2 |  |  |
| Complex lesions (B2/C) / morphology | 2 |  |  |
| Number of stents / multiple stents | 2 |  | YES |
| Stent generation/type | 2 | YES | YES |
| Target lesion LCx / ISR in LCx | 2 |  |  |
| Vessel calcification / nodules | 2 |  |  |
| Balloon-to-vessel ratio | 1 |  |  |
| ISR pattern / time interval | 1 |  |  |
| One-vessel disease | 1 |  |  |
| Periprocedural intracoronary imaging | 1 |  |  |
| Stent in LAD | 1 | YES | YES |
| Vessel size reduction | 1 |  |  |
| Biomarkers | Cholesterol levels | 6 |  |  |
| Gensini score | 4 |  |  |
| LDL-C | 4 |  |  |
| Fasting glucose / Hyperglycaemia | 2 |  |  |
| Platelets / abnormal platelets / PDW | 2 |  |  |
| White blood cells / Leukocytes | 2 |  |  |
| Aggregate Index of Systemic Inflammation | 1 |  |  |
| ApoAI | 1 |  |  |
| ApoB | 1 |  |  |
| Creatinine | 1 |  |  |
| Glycated albumin | 1 |  |  |
| HbA1c | 1 |  |  |
| Haemoglobin | 1 |  |  |
| HsCRP | 1 |  |  |
| Monocyte | 1 |  |  |
| Neutrophil/lymphocyte ratio | 1 |  |  |
| Triglycerides | 1 |  |  |
| Imaging | In-segment diameter stenosis | 1 |  |  |
| In-segment IVUS-MLA | 1 |  |  |
| OCT/IVUS features (calcified nodules, disrupted fibrous tissue, irregular protrusions) | 1 | YES | YES |
| Post-PCI thrombus | 1 |  |  |
| Proximal one-third MLA | 1 |  |  |
| Stent underexpansion | 1 |  |  |

NHR: Netherlands Heart Registration, CKD: chronic kidney disease, ACS: acute coronary syndrome, STEMI: ST-elevation myocardial infarction, LVEF: left ventricular ejection fraction, PCI: percutaneous coronary intervention, BMI: body mass index, COPD: chronic obstructive pulmonary disease, LM: left main (coronary artery), MI: myocardial infarction, ISR: in-stent restenosis, LCx: left circumflex artery, LAD: left anterior descending artery, LDL-C: low-density lipoprotein cholesterol, PDW: platelet distribution width, ApoAI: apolipoprotein AI, ApoB: apolipoprotein B, HbA1c: haemoglobin A1c, HsCRP: high-sensitivity C-reactive protein, IVUS: intravascular ultrasound, MLA: minimal lumen area, OCT: optical coherence tomography

**Supplement Material 2**

**Table S2:** Results of multivariable logistic regression analysis for target lesion revascularization (TLR) within one year after acute (ST-elevation myocardial infarction (STEMI/non-STEMI)) percutaneous coronary intervention (PCI).

| Variable | Regression coefficient | *P*-value |
| --- | --- | --- |
| Intercept | -4.49 |  |
| Age (years)1 | 1.55e-03 |  |
| Sex (Female)1 | 1.04 |  |
| Age*Female | -0.01 | 0.006 |
| Renal insufficiency (eGFR <60) | 0.16 | 0.020 |
| Diabetes mellitus | 0.34 | <0.001 |
| Multivessel disease | 0.13 | 0.041 |
| Cardiogenic shock | 0.42 | 0.001 |
| OHCA | 0.24 | 0.063 |
| Previous MI | 0.26 | 0.001 |
| Previous coronary intervention (PCI and/or CABG) | 0.49 | <0.001 |
| Access site (other than radialis) | 0.39 | <0.001 |
| PCI in LM | 0.39 | 0.001 |
| PCI in arterial or venous grafts | 0.64 | <0.001 |
| Two vessels treated | 0.08 | 0.383 |
| Three or more vessels treated | 0.82 | <0.001 |

1Age and sex cannot be interpreted separately due to the presence of the interaction term Age*Sex.

OR: odds ratio, CI: confidence interval, eGFR: estimated glomerular filtration rate, OHCA: out of hospital cardiac arrest, MI: myocardial infarction, PCI: percutaneous coronary intervention, CABG: coronary artery bypass grafting, LM: left main.

**Table S3:** Results of multivariable logistic regression analysis for target lesion revascularization (TLR) within one year after elective percutaneous coronary intervention (PCI).

| Variable | Regression coefficient | *P*-value |
| --- | --- | --- |
| Intercept | -5.10 |  |
| Age (years) 1 | 0.01 |  |
| Sex (Female) 1 | 1.67 |  |
| Age*Female | -0.02 | 0.004 |
| Diabetes mellitus | 0.52 | <0.001 |
| Multivessel disease | 0.20 | 0.032 |
| Previous coronary intervention (PCI and/or CABG) | 0.35 | <0.001 |
| Access site (other than radialis) | 0.25 | 0.011 |
| PCI in arterial or venous grafts | 0.81 | <0.001 |
| Two vessels treated | 0.33 | 0.001 |
| Three or more vessels treated | 0.68 | <0.001 |

OR: odds ratio, CI: confidence interval, eGFR: estimated glomerular filtration rate, OHCA: out of hospital cardiac arrest, MI: myocardial infarction, PCI: percutaneous coronary intervention, CABG: coronary artery bypass grafting, LM: left main.
